# Supplementary material for: Microparticle Shedding from Neural Progenitor Cells and Vascular Compartment Cells Is Increased in Ischemic Stroke
Source: PubMed Central journal article supplement (PMC4729528; doi:10.1371/journal.pone.0148176), 2016-01-27
Supplement: pone.0148176.s002.pdf [file pone.0148176.s002.pdf]

**S1 Figure.** Gate limits for microparticle analysis with the Megamix-Plus FSC beads for cytometer settings in microparticle analysis.

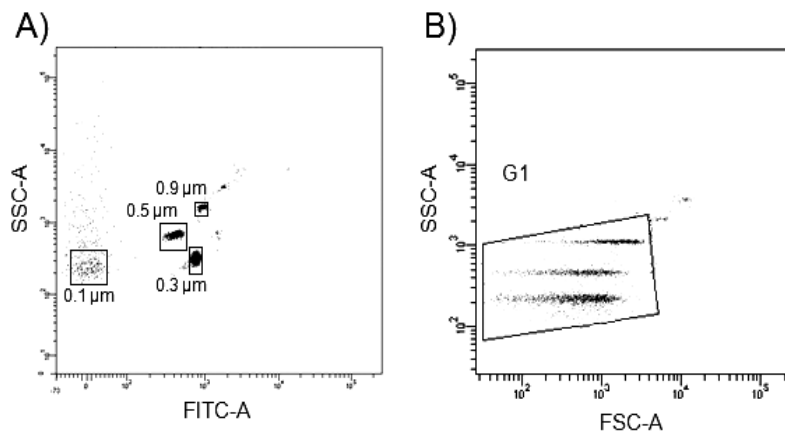

A) Gate limits were established before analyses using the Megamix-Plus FSC beads for cytometer settings in microparticle analysis (BioCytex, Marseille, France). According to Megamix-Plus FSC beads signal, the lower limit of quantification is  $>0.1\mu\text{m}$ , as beads of  $0.1\mu\text{m}$  were negative for FITC signal. B) Gate limits for microparticle quantification (G1) were set according to beads signal.
