# Supplementary material for: Microparticle Shedding from Neural Progenitor Cells and Vascular Compartment Cells Is Increased in Ischemic Stroke
Source: PubMed Central journal article supplement (PMC4729528; doi:10.1371/journal.pone.0148176), 2016-01-27
Supplement: pone.0148176.s005.pdf [file pone.0148176.s005.pdf]

**S1 Table.** Cell surface molecules for circulating microparticle identification and characterization.

| <b>mAb</b>    | <b>Aterantive name</b>                   | <b>Expression</b>                | <b>Conjugation</b> | <b>Clone</b> | <b>Company</b>      |
|---------------|------------------------------------------|----------------------------------|--------------------|--------------|---------------------|
| Annexin V     | PS-binding protein                       | Widely expressed                 | CF405              | --           | Immunostep          |
| IgG1 $\gamma$ | --                                       | --                               | FITC/PE            | X40          | BD Biosciences      |
| IgG1k         | --                                       | --                               | FITC/PE            | MPOC21       | BD Pharmingen       |
| CD56          | Neural Cell Adhesion Molecule            | Leukocytes                       | FITC               | B-A19        | Immunotools         |
| CD34          | Mucosialin                               | Progenitor cells (Hematopoietic) | PE                 | 4H11[APG]    | Immunotools         |
| CD142         | Tissue Factor                            | Widely expressed                 | FITC               | VD8          | Sekisui diagnostics |
| CD61          | $\beta_3$ -integrin                      | Platelets                        | PE                 | VI-PL2       | BD Pharmingen       |
| CD62L         | L-Selectin                               | Leukocytes                       | PE                 | LT-TD180     | Immunotools         |
| CD146         | Melanoma Cell Adhesion Molecule          | Endothelial Cells                | FITC               | P1H12        | BD Pharmingen       |
| CD62E         | E-Selectin                               | Endothelial Cells                | PE                 | 68-5H11      | BD Pharmingen       |
| CD62P         | P-Selectin                               | Activated Platelets              | PE                 | AK-4         | BD Pharmingen       |
| CD235ab       | Glycoporin A and B                       | Erythrocytes                     | FITC               | HIR2         | Immunotools         |
| CD3           | T-cell co-receptor                       | T-Lymphocytes                    | FITC               | HIT3b        | Immunotools         |
| CD45          | Leukocyte Common Antigen                 | Leukocytes                       | PE                 | MEM-28       | Immunotools         |
| CD11a         | Lymphocyte Function-Associated Antigen 1 | Leukocytes                       | FITC               | HI111        | Immunotools         |
| CD29          | Integrin $\beta$ -1                      | Leukocytes                       | FITC               | HI29a        | Immunotools         |
| CD15          | Sialyl Lewis X                           | Leukocytes                       | PE                 | MEM-158      | Immunotools         |
| CD63          | Tetraspanin 30                           | Activated cells                  | FITC               | MEM-259      | Immunotools         |
| CD11b         | Macrophage-1 Antigen (Mac-1)             | Neutrophils, leukocytes          | FITC               | MEM-174      | Immunotools         |
| CD14          | LPS-receptor                             | Macrophages, monocytes           | PE                 | M5E2         | BD Pharmingen       |
| SMA- $\alpha$ | Smooth Muscle Actin $\alpha$             | Smooth muscle cells              | PE                 | 1A4          | R&D Systems         |

mAb indicates monoclonal antibody; PS, phosphatidylserine; FITC, fluorescein isothiocyanate; PE, phycoerythrin; LPS, lipopolysaccharide.
