# Supplementary material for: Microparticle Shedding from Neural Progenitor Cells and Vascular Compartment Cells Is Increased in Ischemic Stroke
Source: PubMed Central journal article supplement (PMC4729528; doi:10.1371/journal.pone.0148176), 2016-01-27
Supplement: pone.0148176.s006.pdf [file pone.0148176.s006.pdf]

**S2 Table. Baseline characteristics of subjects devoid of cardiovascular disease (n = 44) and patients at the onset of stroke (n = 44).**

|                                                     | <b>CONTROLS</b> | <b>PATIENTS</b> | <b>P</b> |
|-----------------------------------------------------|-----------------|-----------------|----------|
| Age (years)                                         | 73.36 ± 5.48    | 70.14 ± 12.29   | 0.595    |
| Current smokers [n (%)]                             | 8 (18.1)        | 9 (20.4)        | 0.748    |
| Type 2 Diabetes Mellitus [n (%)]                    | 6 (13.6)        | 13 (29.5)       | 0.071    |
| Hypertension [n (%)]                                | 22 (50)         | 28 (63.6)       | 0.199    |
| Ischemic cardiomyopathy [n (%)]                     | 0 (0)           | 9 (20.4)        | 0.001    |
| Peripheral vascular disease [n (%)]                 | 0 (0)           | 2 (4.5)         | 0.150    |
| Previous transient ischemic attack [n (%)]          | 0 (0)           | 4 (9.1)         | 0.037    |
| Previous cerebral infarction [n (%)]                | 0 (0)           | 7 (15.9)        | 0.006    |
| Cerebral infarction at inclusion [n (%)]            | 0 (0)           | 44 (100)        | <0.001   |
| Stroke etiology (SSS-TOAST classification), [n (%)] |                 |                 |          |
| Large artery atherothrombosis                       | 0 (0)           | 6 (13.6)        | <0.001   |
| Cardioembolism                                      | 0 (0)           | 13 (29.5)       | <0.001   |
| Small vessel occlusion                              | 0 (0)           | 7 (15.9)        | <0.001   |
| Stroke of other uncommon etiology                   | 0 (0)           | 2 (4.5)         | <0.001   |
| Stroke of undetermined etiology                     | 0 (0)           | 16 (36.4)       | <0.001   |
| Weight (Kg)                                         | 69.61 ± 12.12   | 71.23 ± 10.56   | 0.534    |
| Body Mass Index (kg/m <sup>2</sup> )                | 28.51 ± 4.64    | 26.41 ± 3.15    | 0.026    |
| Body Mass Index >29.9 kg/m <sup>2</sup>             | 5 (11.4)        | 4 (9.1)         | 0.754    |
| Systolic Blood Pressure (mmHg)                      | 148.34 ± 24.25  | 153.93 ± 39.3   | 0.429    |
| Diastolic Blood Pressure (mmHg)                     | 81.07 ± 9.78    | 86.46 ± 18.8    | 0.098    |

Results are expressed as mean ± sd or n (%) when indicated. Used controls were patients at high cardiovascular disease who have never suffered a stroke. *P* value from one-way ANOVA for quantitative variables and from Chi-square analysis for qualitative variables.
