# Supplementary material for: Microparticle Shedding from Neural Progenitor Cells and Vascular Compartment Cells Is Increased in Ischemic Stroke
Source: PLOS journal article supplement (doi:10.1371/journal.pone.0148176), 2016-01-27
Supplement: S3 (10.1371/journal.pone.0148176.s003) [file journal.pone.0148176.s003]

**S2 Figure.** Cell sources of MP for controls and patients at the onset of stroke.

**CONTROLS**

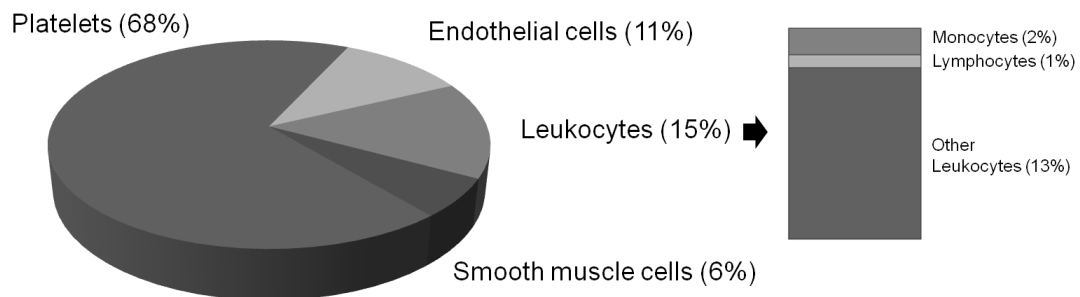

**PATIENTS**

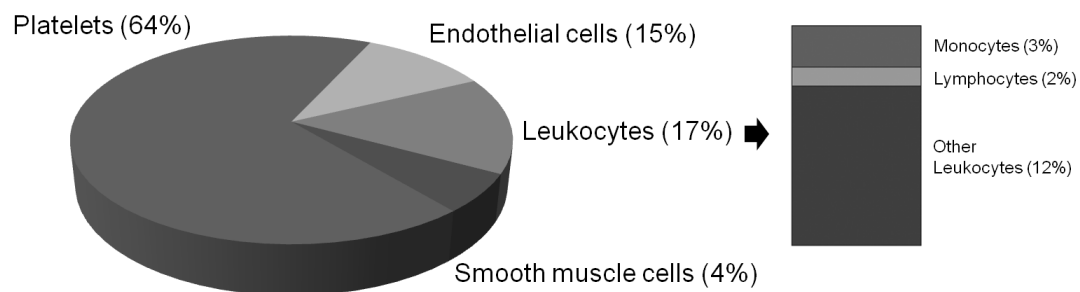

Pie-charts showing distribution of cMPs from controls (n=44) and patients at the onset of stroke (n=44) by major cell origins, indicated by percentages of each marker relative to cell lineage. Used controls were patients at high cardiovascular disease who have never suffered a stroke. Selected markers were CD61 for platelet, CD146 for endothelial cells, CD45 for total leukocytes, CD3 for lymphocyte, CD14 for monocyte and SMA- $\alpha$  for smooth muscle cells origins. Other leukocyte cMPs were positive for CD45 but negative for CD3 or CD14.
